# Supplementary material for: Cobalt-tungsten diselenide-supported nickel foam as a battery-type positive electrode for an asymmetric supercapacitor device: comparison with various MWSe2 (M = Ni, Cu, Zn, and Mn) on the structural and capacitance characteristics
Source: Royal Society of Chemistry journal article supplement (doi:10.1039/d0nr02990d), 2020-01-01
Supplement: d0nr02990d1.pdf [file d0nr02990d1.pdf]

## Supporting Information

### **Cobalt Tungsten Diselenides Supported Nickel Foam as a Battery Type Positive Electrode for Asymmetric Supercapacitor Device: Compared with Various MWSe<sub>2</sub> (M= Ni, Cu, Zn, and Mn) on Structural and Capacitance Characteristics**

Mani Sakthivel<sup>a,b</sup>, Ramki Settu<sup>c</sup>, Shen-Ming Chen<sup>c\*</sup>, Kuo-Chuan Ho<sup>a,b\*\*</sup>

<sup>a</sup>*Department of Chemical Engineering, National Taiwan University, Taipei 10617, Taiwan.*

<sup>b</sup>*Advanced Research Center for Green Materials Science and Technology, National Taiwan University, Taipei 10617, Taiwan.*

<sup>c</sup>*Electroanalysis and Bioelectrochemistry Lab, Department of Chemical Engineering and Biotechnology, National Taipei University of Technology, Taipei 10608, Taiwan.*

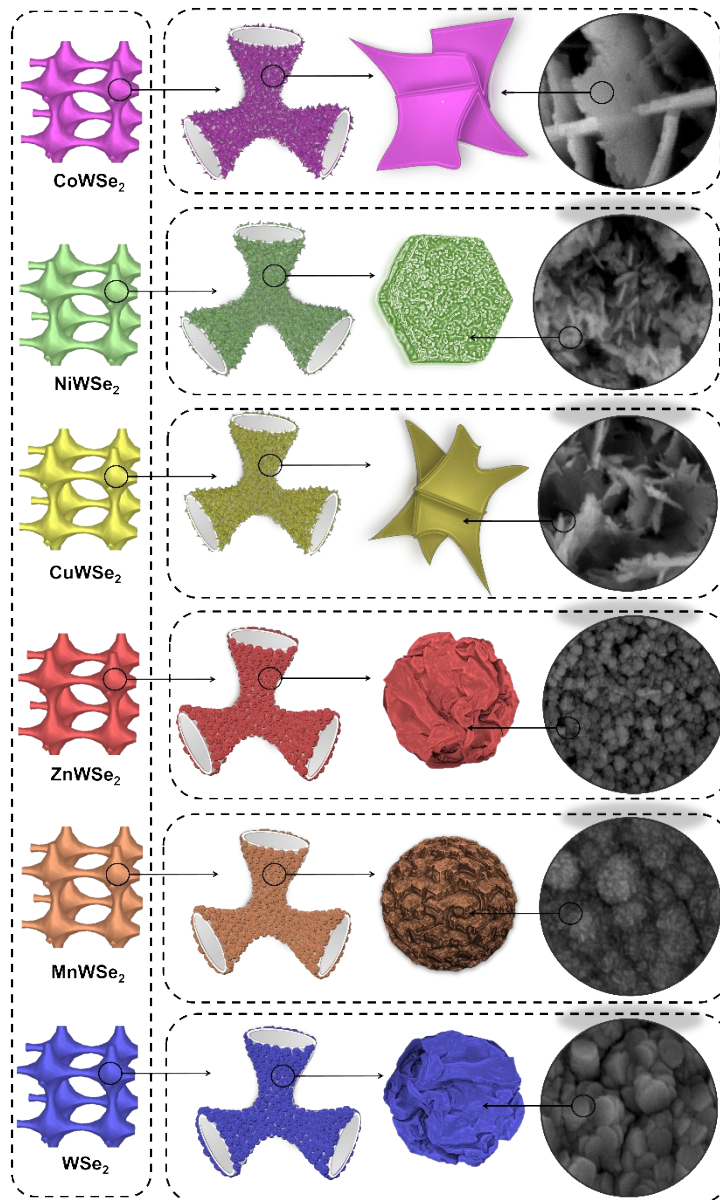

**Scheme S1.** Schematic representation for the morphologies of prepared bimetallic chalcogenides.

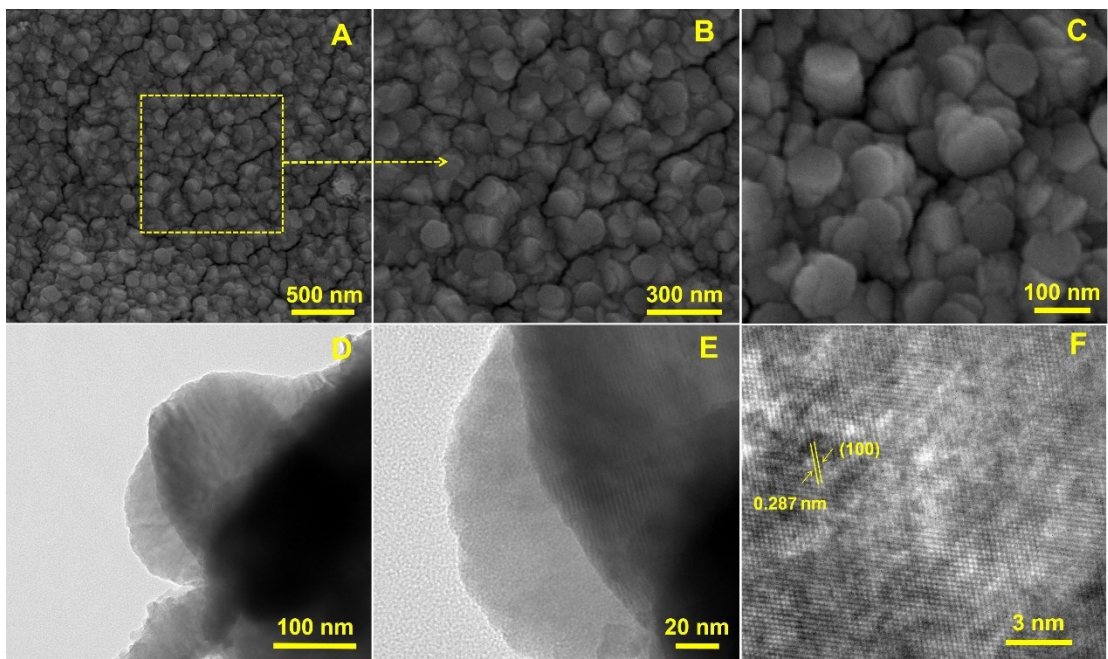

**Figure S1.** (A-C) Different magnified FESEM and (D-F) TEM images of WSe<sub>2</sub> nano coins.

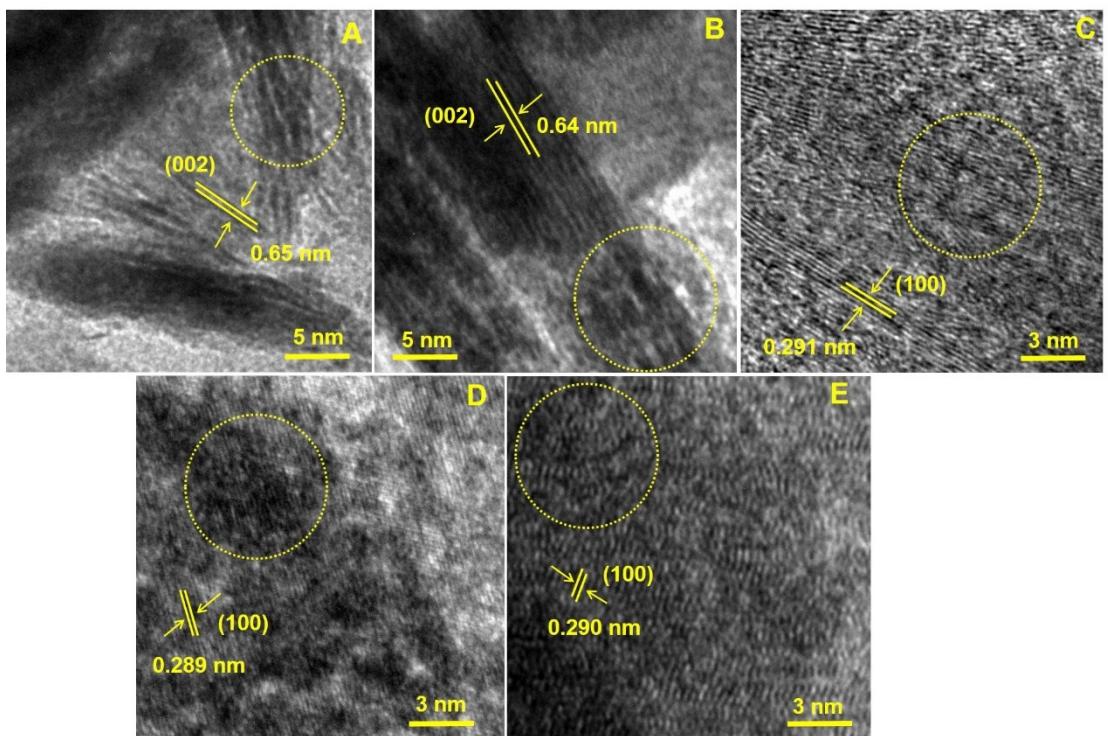

**Figure S2.** HRTEM images of (A) CoWSe<sub>2</sub>, (B) NiWSe<sub>2</sub>, (C) CuWSe<sub>2</sub>, (D) ZnWSe<sub>2</sub>, and (E) MnWSe<sub>2</sub>.

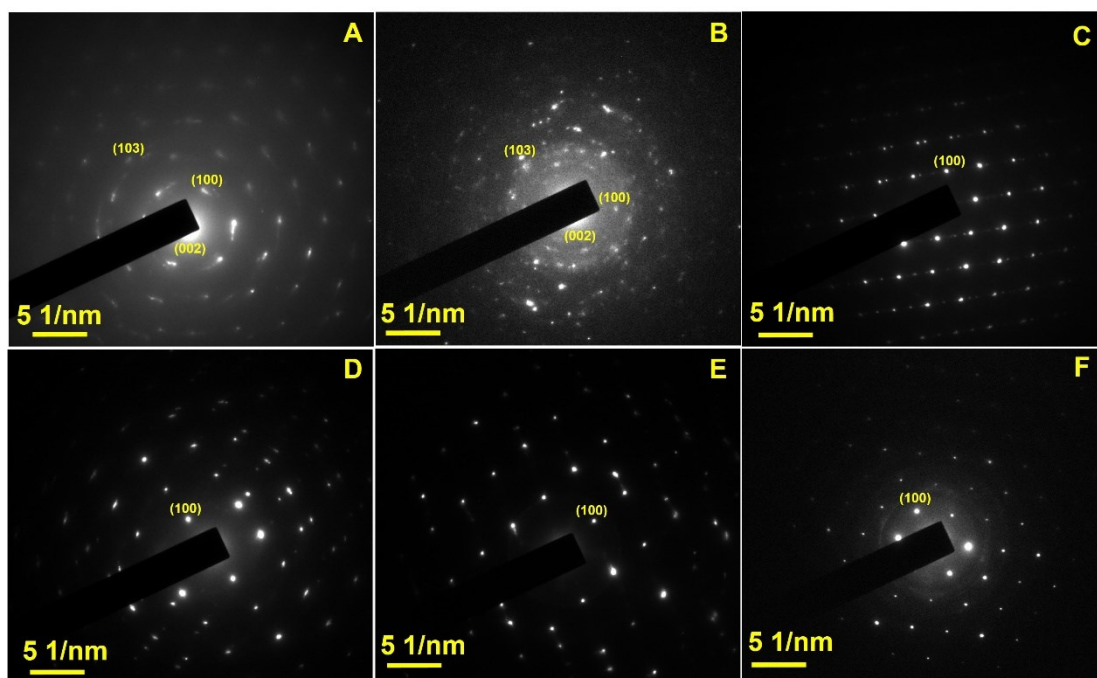

**Figure S3.** SAED pattern of (A)  $\text{CoWSe}_2$ , (B)  $\text{NiWSe}_2$ , (C)  $\text{CuWSe}_2$ , (D)  $\text{ZnWSe}_2$ , (E)  $\text{MnWSe}_2$  and (F)  $\text{WSe}_2$ .

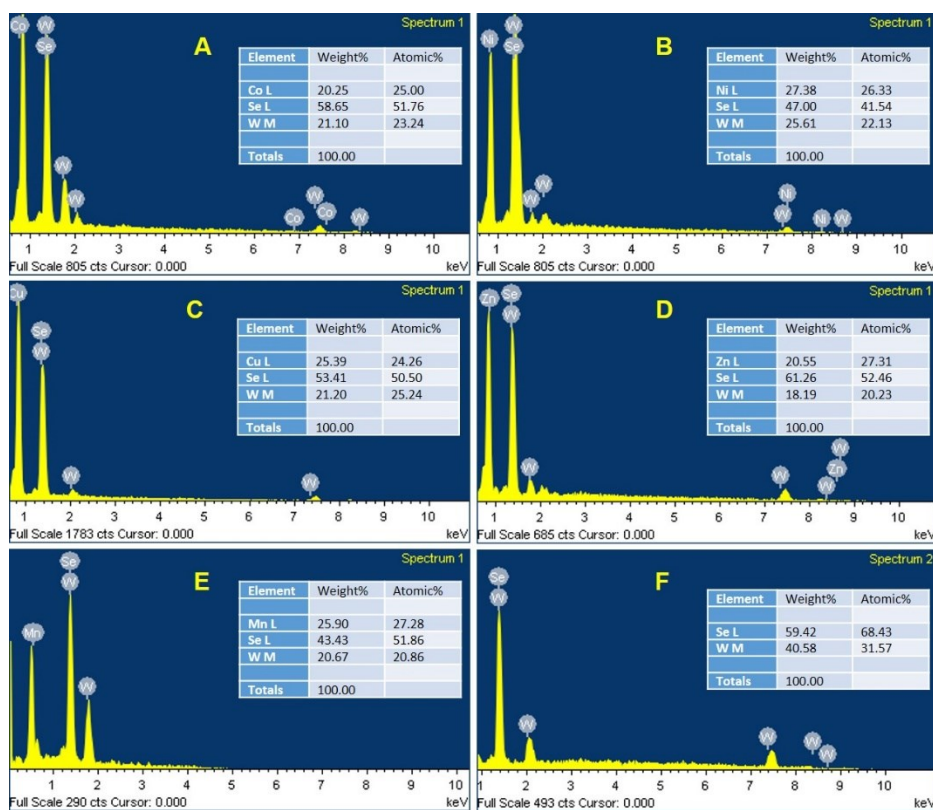

**Figure S4.** EDX spectra of (A)  $\text{CoWSe}_2$ , (B)  $\text{NiWSe}_2$ , (C)  $\text{CuWSe}_2$ , (D)  $\text{ZnWSe}_2$ , (E)  $\text{MnWSe}_2$  and (F)  $\text{WSe}_2$ .

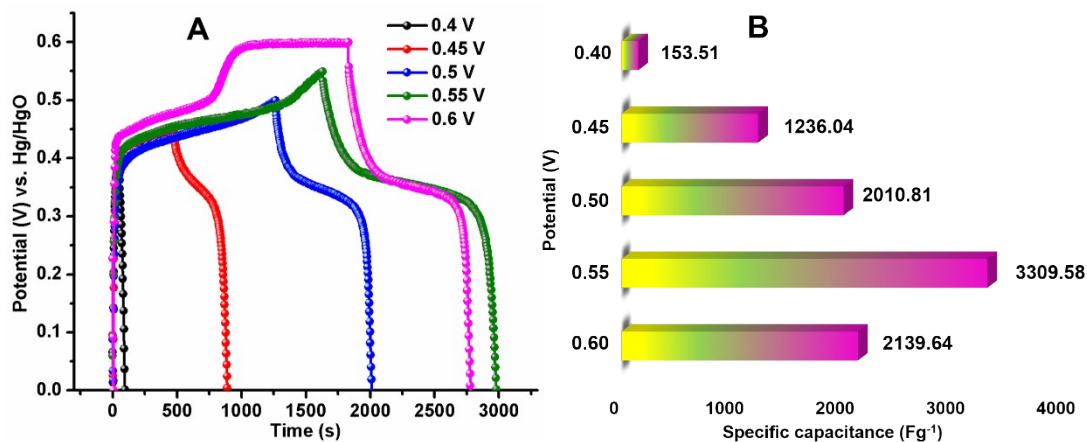

**Figure S5.** (A) GCD profile of CoWSe<sub>2</sub> at various potential window (B) corresponding bar diagram for the specific capacitance vs. applied potential.

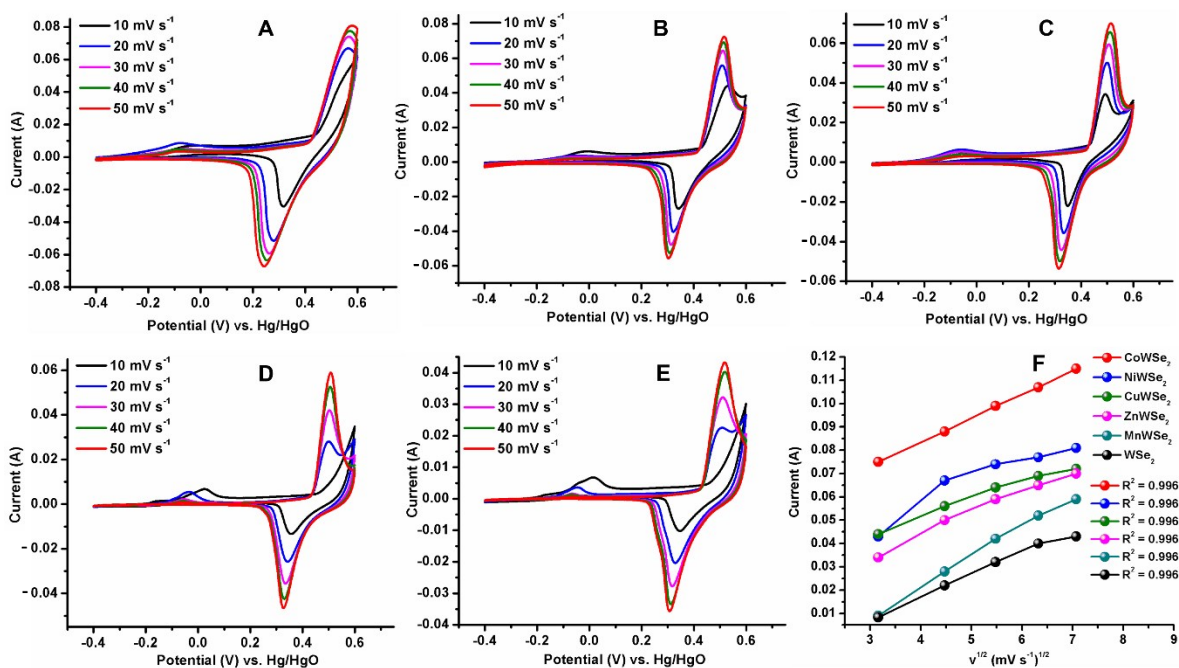

**Figure S6.** CV profiles of (A) NiWSe<sub>2</sub> (B) CuWSe<sub>2</sub> (C) ZnWSe<sub>2</sub> (D) MnWSe<sub>2</sub> and (E) WSe<sub>2</sub>. (F) Calibration plot for square root of scan rate vs. anodic peak current.

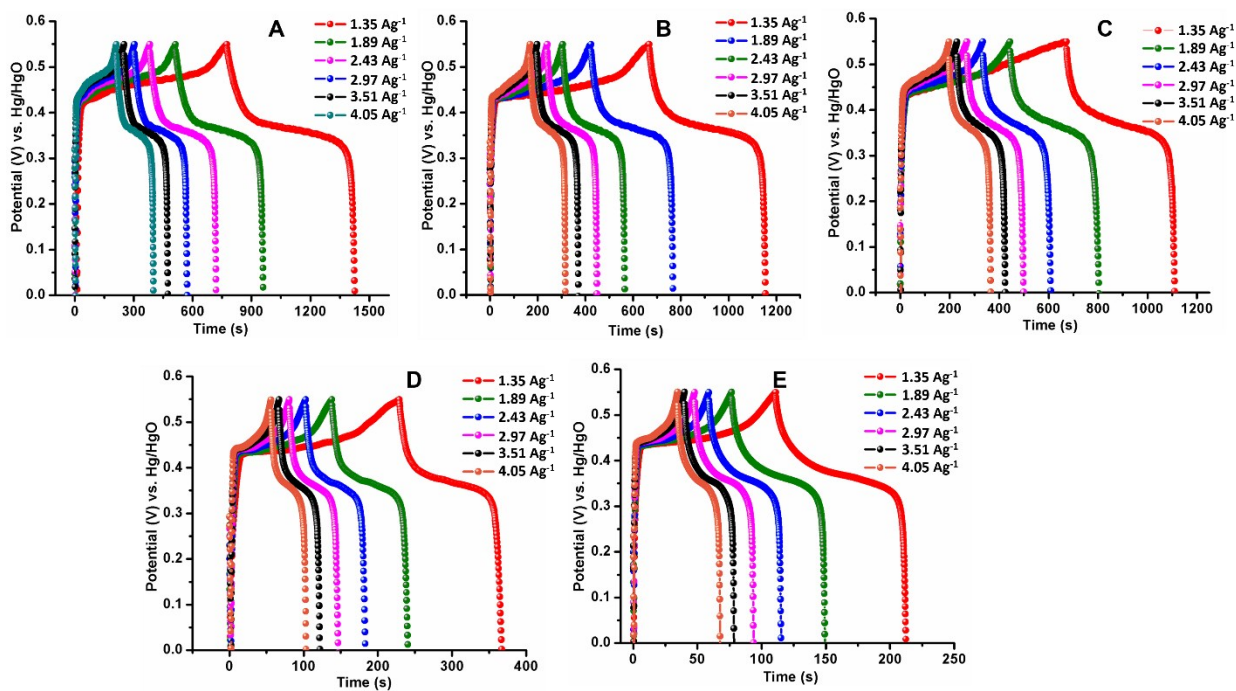

**Figure S7.** GCD profile of (A) NiWSe<sub>2</sub> (B) CuWSe<sub>2</sub> (C) ZnWSe<sub>2</sub> (D) MnWSe<sub>2</sub> and (E) WSe<sub>2</sub> for 1.35, 1.89, 2.43, 2.97, 3.51 and 4.05 Ag<sup>-1</sup>.

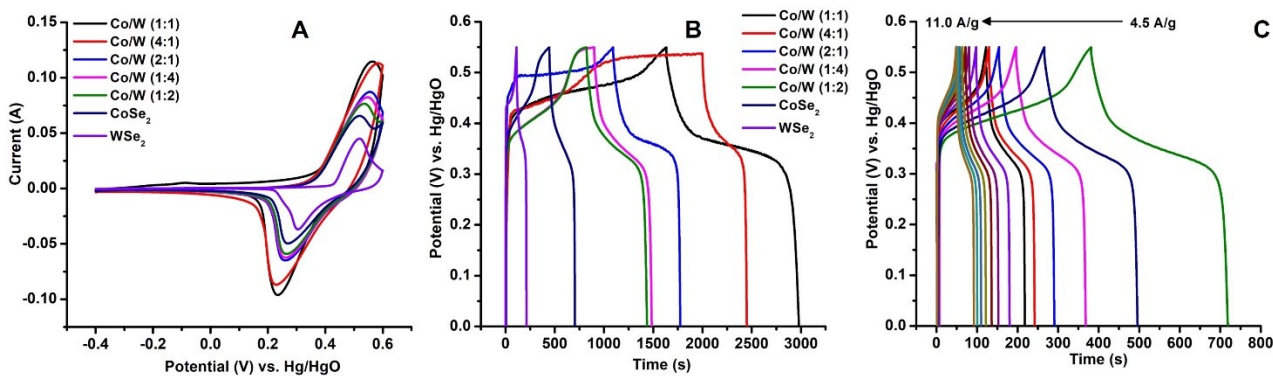

**Figure S8.** (A) CV and (B) GCD response for CoWSe<sub>2</sub> (Co/W = 1:1, 1:2, 1:4, 2:1, 4:1), CoSe<sub>2</sub> and WSe<sub>2</sub> and (C) GCD of CoWSe<sub>2</sub> at higher applied current densities from 4.5 to 11.0 Ag<sup>-1</sup>.

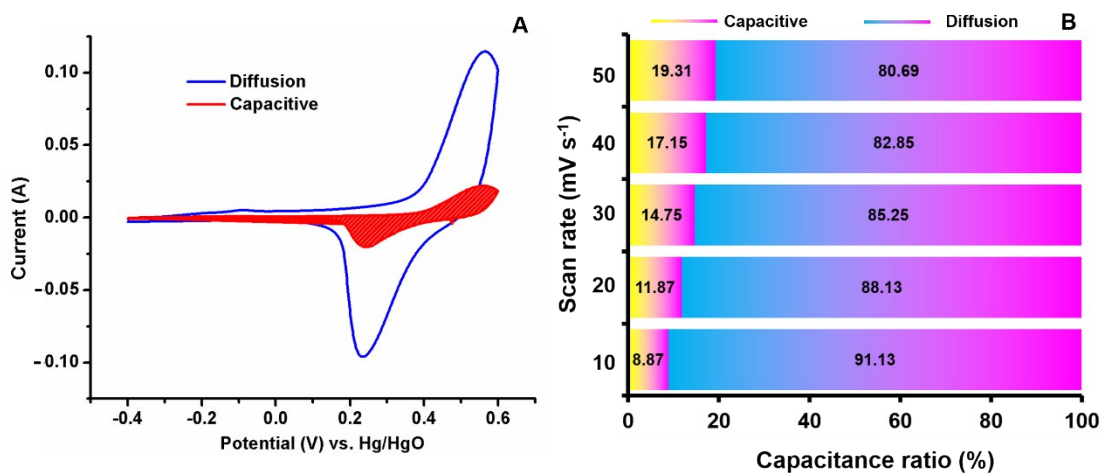

**Figure S9.** (A) CV profile for the diffusion and capacitive charge storage reaction at scan rate of 50 mV s<sup>-1</sup> and (B) bar diagram for corresponding capacitance ratio.

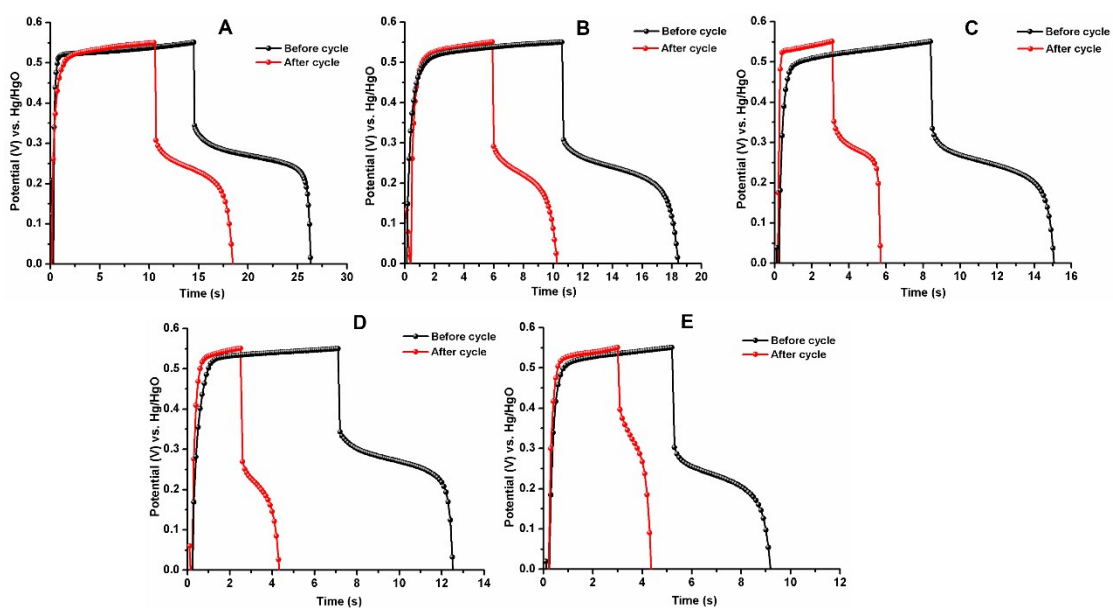

**Figure S10.** GCD response of (A) NiWSe<sub>2</sub> (B) CuWSe<sub>2</sub> (C) ZnWSe<sub>2</sub> (D) MnWSe<sub>2</sub> and (E) WSe<sub>2</sub> before and after 5000<sup>th</sup> cycle.

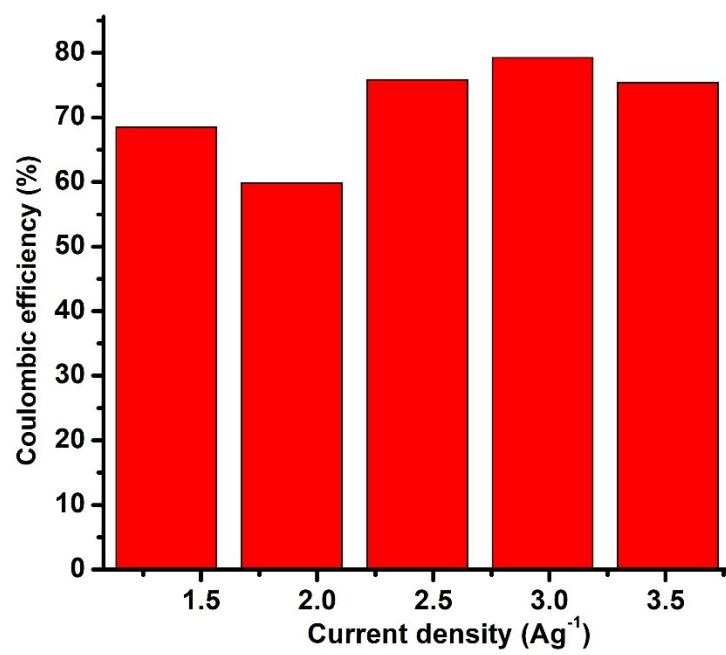

**Figure S11.** Bar diagram for current density vs. coulombic efficiency.
